# Supplementary material
Source: PubMed Central journal article supplement (PMC8096526)

A

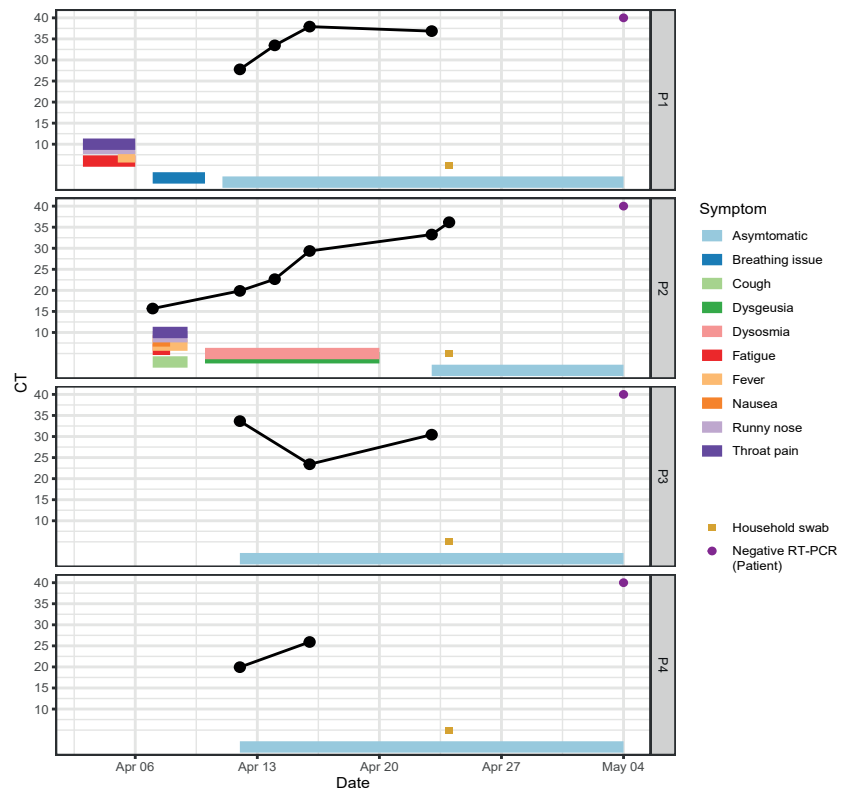

Figure S1

B

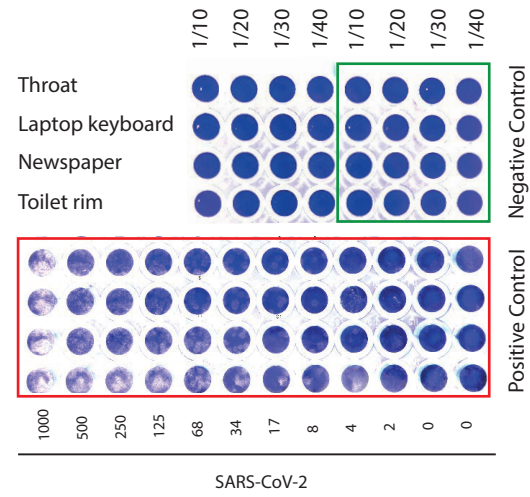

Supplement: mmc1.pdf [file mmc1.pdf]
